# Supplementary material
Source: publisher figshare collection journal article supplement (https://tandf.figshare.com/ndownloader/files/21802470)
Supplement: Supplementary file 1 [file 21802470]

function varargout = ParameterCali_GUI(varargin)

% PARAMETERCALI_GUI MATLAB code for ParameterCali_GUI.fig

% PARAMETERCALI_GUI, by itself, creates a new PARAMETERCALI_GUI or raises the existing

% singleton*.

%

% H = PARAMETERCALI_GUI returns the handle to a new PARAMETERCALI_GUI or the handle to

% the existing singleton*.

%

% PARAMETERCALI_GUI('CALLBACK',hObject,eventData,handles,...) calls the local

% function named CALLBACK in PARAMETERCALI_GUI.M with the given input arguments.

%

% PARAMETERCALI_GUI('Property','Value',...) creates a new PARAMETERCALI_GUI or raises the

% existing singleton*. Starting from the left, property value pairs are

% applied to the GUI before ParameterCali_GUI_OpeningFcn gets called. An

% unrecognized property name or invalid value makes property application

% stop. All inputs are passed to ParameterCali_GUI_OpeningFcn via varargin.

%

% *See GUI Options on GUIDE's Tools menu. Choose "GUI allows only one

% instance to run (singleton)".

%

% See also: GUIDE, GUIDATA, GUIHANDLES

% Edit the above text to modify the response to help ParameterCali_GUI

% Last Modified by GUIDE v2.5 19-Apr-2018 10:52:41

% Begin initialization code - DO NOT EDIT

gui_Singleton = 1;

gui_State = struct('gui_Name', mfilename, ...

'gui_Singleton', gui_Singleton, ...

'gui_OpeningFcn', @ParameterCali_GUI_OpeningFcn, ...

'gui_OutputFcn', @ParameterCali_GUI_OutputFcn, ...

'gui_LayoutFcn', [] , ...

'gui_Callback', []);

if nargin && ischar(varargin{1})

gui_State.gui_Callback = str2func(varargin{1});

end

if nargout

[varargout{1:nargout}] = gui_mainfcn(gui_State, varargin{:});

else

gui_mainfcn(gui_State, varargin{:});

end

% End initialization code - DO NOT EDIT

% --- Executes just before ParameterCali_GUI is made visible.

function ParameterCali_GUI_OpeningFcn(hObject, eventdata, handles, varargin)

% This function has no output args, see OutputFcn.

% hObject handle to figure

% eventdata reserved - to be defined in a future version of MATLAB

% handles structure with handles and user data (see GUIDATA)

% varargin command line arguments to ParameterCali_GUI (see VARARGIN)

% Choose default command line output for ParameterCali_GUI

handles.output = hObject;

% Update handles structure

guidata(hObject, handles);

% UIWAIT makes ParameterCali_GUI wait for user response (see UIRESUME)

% uiwait(handles.figure1);

% --- Outputs from this function are returned to the command line.

function varargout = ParameterCali_GUI_OutputFcn(hObject, eventdata, handles)

% varargout cell array for returning output args (see VARARGOUT);

% hObject handle to figure

% eventdata reserved - to be defined in a future version of MATLAB

% handles structure with handles and user data (see GUIDATA)

% Get default command line output from handles structure

varargout{1} = handles.output;

% --- Executes on button press in pushbutton3.

function pushbutton3_Callback(hObject, eventdata, handles)

% hObject handle to pushbutton3 (see GCBO)

% eventdata reserved - to be defined in a future version of MATLAB

% handles structure with handles and user data (see GUIDATA)

[YH,muH,KS,KoH]=XHcalibration(handles);

[YA,muA,KN,KoA]=XAcalibration(handles);

[bresH,bresA,binaH,binaA]=DOcalibration(handles);

set(handles.YH_tag,'string',num2str(YH))

set(handles.muH_tag,'string',num2str(muH))

set(handles.KS_tag,'string',num2str(KS))

set(handles.KoH_tag,'string',num2str(KoH))

set(handles.YA_tag,'string',num2str(YA))

set(handles.muA_tag,'string',num2str(muA))

set(handles.KN_tag,'string',num2str(KN))

set(handles.KoA_tag,'string',num2str(KoA))

set(handles.bresH_tag,'string',num2str(bresH))

set(handles.bresA_tag,'string',num2str(bresA))

set(handles.binaH_tag,'string',num2str(binaH));

set(handles.binaA_tag,'string',num2str(binaA));

% --- Executes on button press in pushbutton4.

function pushbutton4_Callback(hObject, eventdata, handles)

% hObject handle to pushbutton4 (see GCBO)

% eventdata reserved - to be defined in a future version of MATLAB

% handles structure with handles and user data (see GUIDATA)

[YH,muH,KS,KoH,t_H,S_H,RSS_H]=XHcalibration(handles);

[YA,muA,KN,KoA,t_A,S_A,RSS_A]=XAcalibration(handles);

[bresH,bresA,binaH,binaA,t_O,S_O,RSS_O]=DOcalibration(handles);

data_H=get(handles.XHdata,'data');

data_A=get(handles.XAdata,'data');

data_O=get(handles.RESdata,'data');

Xdata_H=data_H(:,1);

Ydata_H=data_H(:,2);

Xdata_A=data_A(:,1);

Ydata_A=data_A(:,2);

Xdata_O=data_O(:,1);

Ydata_O=data_O(:,2);

str=get(handles.TimeUnit,'string');

val=get(handles.TimeUnit,'value');

switch str{val}

case 'second'

ti_H=t_H*60*60*24;

ti_A=t_A*60*60*24;

ti_O=t_O*60*60*24;

TimeText='Time (scond)';

case 'minute'

ti_H=t_H*60*24;

ti_A=t_A*60*24;

ti_O=t_O*60*24;

TimeText='Time (minute)';

case 'hour'

ti_H=t_H*24;

ti_A=t_A*24;

ti_O=t_O*24;

TimeText='Time (hour)';

case 'day'

ti_H=t_H;

ti_A=t_A;

ti_O=t_O;

TimeText='Time (day)';

end

figure(1)

subplot(3,1,1)

plot(ti_H,S_H,'k-',Xdata_H,Ydata_H,'ko')

xlabel(TimeText)

ylabel('DO cocentration')

legend('Model data','Experimental data')

title(['Heterotrophic respiration, Residual sum of squres = '...

num2str(RSS_H)])

subplot(3,1,2)

plot(ti_A,S_A,'k-',Xdata_A,Ydata_A,'ko')

xlabel(TimeText)

ylabel('DO cocentration')

legend('Model data','Experimental data')

title(['Autotrophic respiration, Residual sum of squres = '...

num2str(RSS_A)])

subplot(3,1,3)

plot(ti_O,S_O,'k-',Xdata_O,Ydata_O,'ko')

xlabel(TimeText)

ylabel('DO cocentration')

legend('Model data','Experimental data')

title(['Endogenous respiration, Residual sum of squres = '...

num2str(RSS_O)])

% --- Executes on button press in pushbutton5.

function pushbutton5_Callback(hObject, eventdata, handles)

% hObject handle to pushbutton5 (see GCBO)

% eventdata reserved - to be defined in a future version of MATLAB

% handles structure with handles and user data (see GUIDATA)

muH=str2double(get(handles.muH_tag,'string'));

muA=str2double(get(handles.muA_tag,'string'));

KS=str2double(get(handles.KS_tag,'string'));

KN=str2double(get(handles.KN_tag,'string'));

KoH=str2double(get(handles.KoH_tag,'string'));

KoA=str2double(get(handles.KoA_tag,'string'));

YH=str2double(get(handles.YH_tag,'string'));

YA=str2double(get(handles.YA_tag,'string'));

binaH=str2double(get(handles.binaH_tag,'string'));

binaA=str2double(get(handles.binaA_tag,'string'));

bresH=str2double(get(handles.bresH_tag,'string'));

bresA=str2double(get(handles.bresA_tag,'string'));

ParaVal=[muH KS KoH YH binaH bresH; muA KN KoA YA binaA bresA]';

setappdata(0,'CaliPara',ParaVal);

% --- Executes on button press in pushbutton12.

function pushbutton12_Callback(hObject, eventdata, handles)

% hObject handle to pushbutton12 (see GCBO)

% eventdata reserved - to be defined in a future version of MATLAB

% handles structure with handles and user data (see GUIDATA)

YH=0.67; muH=6; KS=20; KoH=0.2;

YA=0.24; muA=0.8; KN=1; KoA=0.4;

bresH=0.32; bresA=0.12; binaH=0.08; binaA=0.03;

set(handles.YH_tag,'string',num2str(YH))

set(handles.muH_tag,'string',num2str(muH))

set(handles.KS_tag,'string',num2str(KS))

set(handles.KoH_tag,'string',num2str(KoH))

set(handles.YA_tag,'string',num2str(YA))

set(handles.muA_tag,'string',num2str(muA))

set(handles.KN_tag,'string',num2str(KN))

set(handles.KoA_tag,'string',num2str(KoA))

set(handles.bresH_tag,'string',num2str(bresH))

set(handles.bresA_tag,'string',num2str(bresA))

set(handles.binaH_tag,'string',num2str(binaH));

set(handles.binaA_tag,'string',num2str(binaA));

function binaA_tag_Callback(hObject, eventdata, handles)

% hObject handle to binaA_tag (see GCBO)

% eventdata reserved - to be defined in a future version of MATLAB

% handles structure with handles and user data (see GUIDATA)

% Hints: get(hObject,'String') returns contents of binaA_tag as text

% str2double(get(hObject,'String')) returns contents of binaA_tag as a double

% --- Executes during object creation, after setting all properties.

function binaA_tag_CreateFcn(hObject, eventdata, handles)

% hObject handle to binaA_tag (see GCBO)

% eventdata reserved - to be defined in a future version of MATLAB

% handles empty - handles not created until after all CreateFcns called

% Hint: edit controls usually have a white background on Windows.

% See ISPC and COMPUTER.

if ispc && isequal(get(hObject,'BackgroundColor'), get(0,'defaultUicontrolBackgroundColor'))

set(hObject,'BackgroundColor','white');

end

function binaH_tag_Callback(hObject, eventdata, handles)

% hObject handle to binaH_tag (see GCBO)

% eventdata reserved - to be defined in a future version of MATLAB

% handles structure with handles and user data (see GUIDATA)

% Hints: get(hObject,'String') returns contents of binaH_tag as text

% str2double(get(hObject,'String')) returns contents of binaH_tag as a double

% --- Executes during object creation, after setting all properties.

function binaH_tag_CreateFcn(hObject, eventdata, handles)

% hObject handle to binaH_tag (see GCBO)

% eventdata reserved - to be defined in a future version of MATLAB

% handles empty - handles not created until after all CreateFcns called

% Hint: edit controls usually have a white background on Windows.

% See ISPC and COMPUTER.

if ispc && isequal(get(hObject,'BackgroundColor'), get(0,'defaultUicontrolBackgroundColor'))

set(hObject,'BackgroundColor','white');

end

function bresA_tag_Callback(hObject, eventdata, handles)

% hObject handle to bresA_tag (see GCBO)

% eventdata reserved - to be defined in a future version of MATLAB

% handles structure with handles and user data (see GUIDATA)

% Hints: get(hObject,'String') returns contents of bresA_tag as text

% str2double(get(hObject,'String')) returns contents of bresA_tag as a double

% --- Executes during object creation, after setting all properties.

function bresA_tag_CreateFcn(hObject, eventdata, handles)

% hObject handle to bresA_tag (see GCBO)

% eventdata reserved - to be defined in a future version of MATLAB

% handles empty - handles not created until after all CreateFcns called

% Hint: edit controls usually have a white background on Windows.

% See ISPC and COMPUTER.

if ispc && isequal(get(hObject,'BackgroundColor'), get(0,'defaultUicontrolBackgroundColor'))

set(hObject,'BackgroundColor','white');

end

function bresH_tag_Callback(hObject, eventdata, handles)

% hObject handle to bresH_tag (see GCBO)

% eventdata reserved - to be defined in a future version of MATLAB

% handles structure with handles and user data (see GUIDATA)

% Hints: get(hObject,'String') returns contents of bresH_tag as text

% str2double(get(hObject,'String')) returns contents of bresH_tag as a double

% --- Executes during object creation, after setting all properties.

function bresH_tag_CreateFcn(hObject, eventdata, handles)

% hObject handle to bresH_tag (see GCBO)

% eventdata reserved - to be defined in a future version of MATLAB

% handles empty - handles not created until after all CreateFcns called

% Hint: edit controls usually have a white background on Windows.

% See ISPC and COMPUTER.

if ispc && isequal(get(hObject,'BackgroundColor'), get(0,'defaultUicontrolBackgroundColor'))

set(hObject,'BackgroundColor','white');

end

function YA_tag_Callback(hObject, eventdata, handles)

% hObject handle to YA_tag (see GCBO)

% eventdata reserved - to be defined in a future version of MATLAB

% handles structure with handles and user data (see GUIDATA)

% Hints: get(hObject,'String') returns contents of YA_tag as text

% str2double(get(hObject,'String')) returns contents of YA_tag as a double

% --- Executes during object creation, after setting all properties.

function YA_tag_CreateFcn(hObject, eventdata, handles)

% hObject handle to YA_tag (see GCBO)

% eventdata reserved - to be defined in a future version of MATLAB

% handles empty - handles not created until after all CreateFcns called

% Hint: edit controls usually have a white background on Windows.

% See ISPC and COMPUTER.

if ispc && isequal(get(hObject,'BackgroundColor'), get(0,'defaultUicontrolBackgroundColor'))

set(hObject,'BackgroundColor','white');

end

function muA_tag_Callback(hObject, eventdata, handles)

% hObject handle to muA_tag (see GCBO)

% eventdata reserved - to be defined in a future version of MATLAB

% handles structure with handles and user data (see GUIDATA)

% Hints: get(hObject,'String') returns contents of muA_tag as text

% str2double(get(hObject,'String')) returns contents of muA_tag as a double

% --- Executes during object creation, after setting all properties.

function muA_tag_CreateFcn(hObject, eventdata, handles)

% hObject handle to muA_tag (see GCBO)

% eventdata reserved - to be defined in a future version of MATLAB

% handles empty - handles not created until after all CreateFcns called

% Hint: edit controls usually have a white background on Windows.

% See ISPC and COMPUTER.

if ispc && isequal(get(hObject,'BackgroundColor'), get(0,'defaultUicontrolBackgroundColor'))

set(hObject,'BackgroundColor','white');

end

function KN_tag_Callback(hObject, eventdata, handles)

% hObject handle to KN_tag (see GCBO)

% eventdata reserved - to be defined in a future version of MATLAB

% handles structure with handles and user data (see GUIDATA)

% Hints: get(hObject,'String') returns contents of KN_tag as text

% str2double(get(hObject,'String')) returns contents of KN_tag as a double

% --- Executes during object creation, after setting all properties.

function KN_tag_CreateFcn(hObject, eventdata, handles)

% hObject handle to KN_tag (see GCBO)

% eventdata reserved - to be defined in a future version of MATLAB

% handles empty - handles not created until after all CreateFcns called

% Hint: edit controls usually have a white background on Windows.

% See ISPC and COMPUTER.

if ispc && isequal(get(hObject,'BackgroundColor'), get(0,'defaultUicontrolBackgroundColor'))

set(hObject,'BackgroundColor','white');

end

function KoA_tag_Callback(hObject, eventdata, handles)

% hObject handle to KoA_tag (see GCBO)

% eventdata reserved - to be defined in a future version of MATLAB

% handles structure with handles and user data (see GUIDATA)

% Hints: get(hObject,'String') returns contents of KoA_tag as text

% str2double(get(hObject,'String')) returns contents of KoA_tag as a double

% --- Executes during object creation, after setting all properties.

function KoA_tag_CreateFcn(hObject, eventdata, handles)

% hObject handle to KoA_tag (see GCBO)

% eventdata reserved - to be defined in a future version of MATLAB

% handles empty - handles not created until after all CreateFcns called

% Hint: edit controls usually have a white background on Windows.

% See ISPC and COMPUTER.

if ispc && isequal(get(hObject,'BackgroundColor'), get(0,'defaultUicontrolBackgroundColor'))

set(hObject,'BackgroundColor','white');

end

function KoH_tag_Callback(hObject, eventdata, handles)

% hObject handle to KoH_tag (see GCBO)

% eventdata reserved - to be defined in a future version of MATLAB

% handles structure with handles and user data (see GUIDATA)

% Hints: get(hObject,'String') returns contents of KoH_tag as text

% str2double(get(hObject,'String')) returns contents of KoH_tag as a double

% --- Executes during object creation, after setting all properties.

function KoH_tag_CreateFcn(hObject, eventdata, handles)

% hObject handle to KoH_tag (see GCBO)

% eventdata reserved - to be defined in a future version of MATLAB

% handles empty - handles not created until after all CreateFcns called

% Hint: edit controls usually have a white background on Windows.

% See ISPC and COMPUTER.

if ispc && isequal(get(hObject,'BackgroundColor'), get(0,'defaultUicontrolBackgroundColor'))

set(hObject,'BackgroundColor','white');

end

function KS_tag_Callback(hObject, eventdata, handles)

% hObject handle to KS_tag (see GCBO)

% eventdata reserved - to be defined in a future version of MATLAB

% handles structure with handles and user data (see GUIDATA)

% Hints: get(hObject,'String') returns contents of KS_tag as text

% str2double(get(hObject,'String')) returns contents of KS_tag as a double

% --- Executes during object creation, after setting all properties.

function KS_tag_CreateFcn(hObject, eventdata, handles)

% hObject handle to KS_tag (see GCBO)

% eventdata reserved - to be defined in a future version of MATLAB

% handles empty - handles not created until after all CreateFcns called

% Hint: edit controls usually have a white background on Windows.

% See ISPC and COMPUTER.

if ispc && isequal(get(hObject,'BackgroundColor'), get(0,'defaultUicontrolBackgroundColor'))

set(hObject,'BackgroundColor','white');

end

function muH_tag_Callback(hObject, eventdata, handles)

% hObject handle to muH_tag (see GCBO)

% eventdata reserved - to be defined in a future version of MATLAB

% handles structure with handles and user data (see GUIDATA)

% Hints: get(hObject,'String') returns contents of muH_tag as text

% str2double(get(hObject,'String')) returns contents of muH_tag as a double

% --- Executes during object creation, after setting all properties.

function muH_tag_CreateFcn(hObject, eventdata, handles)

% hObject handle to muH_tag (see GCBO)

% eventdata reserved - to be defined in a future version of MATLAB

% handles empty - handles not created until after all CreateFcns called

% Hint: edit controls usually have a white background on Windows.

% See ISPC and COMPUTER.

if ispc && isequal(get(hObject,'BackgroundColor'), get(0,'defaultUicontrolBackgroundColor'))

set(hObject,'BackgroundColor','white');

end

function YH_tag_Callback(hObject, eventdata, handles)

% hObject handle to YH_tag (see GCBO)

% eventdata reserved - to be defined in a future version of MATLAB

% handles structure with handles and user data (see GUIDATA)

% Hints: get(hObject,'String') returns contents of YH_tag as text

% str2double(get(hObject,'String')) returns contents of YH_tag as a double

% --- Executes during object creation, after setting all properties.

function YH_tag_CreateFcn(hObject, eventdata, handles)

% hObject handle to YH_tag (see GCBO)

% eventdata reserved - to be defined in a future version of MATLAB

% handles empty - handles not created until after all CreateFcns called

% Hint: edit controls usually have a white background on Windows.

% See ISPC and COMPUTER.

if ispc && isequal(get(hObject,'BackgroundColor'), get(0,'defaultUicontrolBackgroundColor'))

set(hObject,'BackgroundColor','white');

end

% --- Executes on button press in pushbutton10.

function pushbutton10_Callback(hObject, eventdata, handles)

% hObject handle to pushbutton10 (see GCBO)

% eventdata reserved - to be defined in a future version of MATLAB

% handles structure with handles and user data (see GUIDATA)

data=get(handles.RESdata,'data');

data(end+1,:)=0;

set(handles.RESdata,'data',data)

% --- Executes on button press in pushbutton11.

function pushbutton11_Callback(hObject, eventdata, handles)

% hObject handle to pushbutton11 (see GCBO)

% eventdata reserved - to be defined in a future version of MATLAB

% handles structure with handles and user data (see GUIDATA)

set(handles.RESdata,'data',[0 0])

% --- Executes on button press in pushbutton9.

function pushbutton9_Callback(hObject, eventdata, handles)

% hObject handle to pushbutton9 (see GCBO)

% eventdata reserved - to be defined in a future version of MATLAB

% handles structure with handles and user data (see GUIDATA)

set(handles.XAdata,'data',[0 0])

% --- Executes on button press in pushbutton8.

function pushbutton8_Callback(hObject, eventdata, handles)

% hObject handle to pushbutton8 (see GCBO)

% eventdata reserved - to be defined in a future version of MATLAB

% handles structure with handles and user data (see GUIDATA)

data=get(handles.XAdata,'data');

data(end+1,:)=0;

set(handles.XAdata,'data',data)

% --- Executes on button press in pushbutton6.

function pushbutton6_Callback(hObject, eventdata, handles)

% hObject handle to pushbutton6 (see GCBO)

% eventdata reserved - to be defined in a future version of MATLAB

% handles structure with handles and user data (see GUIDATA)

data=get(handles.XHdata,'data');

data(end+1,:)=0;

set(handles.XHdata,'data',data)

% --- Executes on button press in pushbutton7.

function pushbutton7_Callback(hObject, eventdata, handles)

% hObject handle to pushbutton7 (see GCBO)

% eventdata reserved - to be defined in a future version of MATLAB

% handles structure with handles and user data (see GUIDATA)

set(handles.XHdata,'data',[0 0])

function XH_tag_Callback(hObject, eventdata, handles)

% hObject handle to XH_tag (see GCBO)

% eventdata reserved - to be defined in a future version of MATLAB

% handles structure with handles and user data (see GUIDATA)

% Hints: get(hObject,'String') returns contents of XH_tag as text

% str2double(get(hObject,'String')) returns contents of XH_tag as a double

% --- Executes during object creation, after setting all properties.

function XH_tag_CreateFcn(hObject, eventdata, handles)

% hObject handle to XH_tag (see GCBO)

% eventdata reserved - to be defined in a future version of MATLAB

% handles empty - handles not created until after all CreateFcns called

% Hint: edit controls usually have a white background on Windows.

% See ISPC and COMPUTER.

if ispc && isequal(get(hObject,'BackgroundColor'), get(0,'defaultUicontrolBackgroundColor'))

set(hObject,'BackgroundColor','white');

end

function XA_tag_Callback(hObject, eventdata, handles)

% hObject handle to XA_tag (see GCBO)

% eventdata reserved - to be defined in a future version of MATLAB

% handles structure with handles and user data (see GUIDATA)

% Hints: get(hObject,'String') returns contents of XA_tag as text

% str2double(get(hObject,'String')) returns contents of XA_tag as a double

% --- Executes during object creation, after setting all properties.

function XA_tag_CreateFcn(hObject, eventdata, handles)

% hObject handle to XA_tag (see GCBO)

% eventdata reserved - to be defined in a future version of MATLAB

% handles empty - handles not created until after all CreateFcns called

% Hint: edit controls usually have a white background on Windows.

% See ISPC and COMPUTER.

if ispc && isequal(get(hObject,'BackgroundColor'), get(0,'defaultUicontrolBackgroundColor'))

set(hObject,'BackgroundColor','white');

end

function Sn_tag_Callback(hObject, eventdata, handles)

% hObject handle to Sn_tag (see GCBO)

% eventdata reserved - to be defined in a future version of MATLAB

% handles structure with handles and user data (see GUIDATA)

% Hints: get(hObject,'String') returns contents of Sn_tag as text

% str2double(get(hObject,'String')) returns contents of Sn_tag as a double

% --- Executes during object creation, after setting all properties.

function Sn_tag_CreateFcn(hObject, eventdata, handles)

% hObject handle to Sn_tag (see GCBO)

% eventdata reserved - to be defined in a future version of MATLAB

% handles empty - handles not created until after all CreateFcns called

% Hint: edit controls usually have a white background on Windows.

% See ISPC and COMPUTER.

if ispc && isequal(get(hObject,'BackgroundColor'), get(0,'defaultUicontrolBackgroundColor'))

set(hObject,'BackgroundColor','white');

end

function Ss_tag_Callback(hObject, eventdata, handles)

% hObject handle to Ss_tag (see GCBO)

% eventdata reserved - to be defined in a future version of MATLAB

% handles structure with handles and user data (see GUIDATA)

% Hints: get(hObject,'String') returns contents of Ss_tag as text

% str2double(get(hObject,'String')) returns contents of Ss_tag as a double

% --- Executes during object creation, after setting all properties.

function Ss_tag_CreateFcn(hObject, eventdata, handles)

% hObject handle to Ss_tag (see GCBO)

% eventdata reserved - to be defined in a future version of MATLAB

% handles empty - handles not created until after all CreateFcns called

% Hint: edit controls usually have a white background on Windows.

% See ISPC and COMPUTER.

if ispc && isequal(get(hObject,'BackgroundColor'), get(0,'defaultUicontrolBackgroundColor'))

set(hObject,'BackgroundColor','white');

end

% --- Executes on button press in pushbutton13.

function pushbutton13_Callback(hObject, eventdata, handles)

% hObject handle to pushbutton13 (see GCBO)

% eventdata reserved - to be defined in a future version of MATLAB

% handles structure with handles and user data (see GUIDATA)

[name,path]=uigetfile({'*.xlsx';'*.xls'},'File selector');

filename=[path name];

XHread=xlsread(filename,'A:B');

XAread=xlsread(filename,'C:D');

RESread=xlsread(filename,'E:F');

set(handles.XHdata,'data',XHread)

set(handles.XAdata,'data',XAread)

set(handles.RESdata,'data',RESread)

% --- Executes on selection change in TimeUnit.

function TimeUnit_Callback(hObject, eventdata, handles)

% hObject handle to TimeUnit (see GCBO)

% eventdata reserved - to be defined in a future version of MATLAB

% handles structure with handles and user data (see GUIDATA)

% Hints: contents = cellstr(get(hObject,'String')) returns TimeUnit contents as cell array

% contents{get(hObject,'Value')} returns selected item from TimeUnit

% --- Executes during object creation, after setting all properties.

function TimeUnit_CreateFcn(hObject, eventdata, handles)

% hObject handle to TimeUnit (see GCBO)

% eventdata reserved - to be defined in a future version of MATLAB

% handles empty - handles not created until after all CreateFcns called

% Hint: popupmenu controls usually have a white background on Windows.

% See ISPC and COMPUTER.

if ispc && isequal(get(hObject,'BackgroundColor'), get(0,'defaultUicontrolBackgroundColor'))

set(hObject,'BackgroundColor','white');

end

function [YH,muH,KS,KoH,t,S,resnorm]=XHcalibration(handles)

XH=str2double(get(handles.XH_tag,'string'));

Ss=str2double(get(handles.Ss_tag,'string'));

exdata=get(handles.XHdata,'data');

So=exdata(1,2);

Y_in=str2double(get(handles.YH_tag,'string'));

mu_in=str2double(get(handles.muH_tag,'string'));

Ks_in=str2double(get(handles.KS_tag,'string'));

Ko_in=str2double(get(handles.KoH_tag,'string'));

str=get(handles.TimeUnit,'string');

val=get(handles.TimeUnit,'value');

switch str{val}

case 'second'

time=exdata(:,1)/60/60/24;

case 'minute'

time=exdata(:,1)/60/24;

case 'hour'

time=exdata(:,1)/24;

case 'day'

time=exdata(:,1);

end

DO=exdata(:,2);

xo=[Y_in mu_in Ks_in Ko_in];

if get(handles.HBR10,'value')

BR=0.1;

elseif get(handles.HBR20,'value')

BR=0.2;

elseif get(handles.HBR50,'value')

BR=0.5;

elseif get(handles.HBR100,'value')

BR=1;

end

lb=xo-BR*xo;

ub=xo+BR*xo;

[x,resnorm]=lsqcurvefit(@Monod,xo,time,DO,lb,ub,[],XH,Ss,So);

YH=x(1); muH=x(2); KS=x(3); KoH=x(4);

t=linspace(0,time(end),200);

S=Monod(x,t,XH,Ss,So);

function S=Monod(x,time,XH,Ss,So)

Y=x(1);

mu=x(2);

Ks=x(3);

Ko=x(4);

[t,S]=ode45(@respmodel,time,So,[],XH,Ss,mu,Ks,Ko,Y);

function dSdt=respmodel(t,So,XH,Ss,mu,Ks,Ko,Y)

dSdt=-((1-Y)/Y)*mu*XH*(Ss/(Ks+Ss))*(So/(Ko+So));

function [YA,muA,KN,KoA,t,S,resnorm]=XAcalibration(handles)

XA=str2double(get(handles.XA_tag,'string'));

Sn=str2double(get(handles.Sn_tag,'string'));

exdata=get(handles.XAdata,'data');

So=exdata(1,2);

Y_in=str2double(get(handles.YA_tag,'string'));

mu_in=str2double(get(handles.muA_tag,'string'));

Ks_in=str2double(get(handles.KN_tag,'string'));

Ko_in=str2double(get(handles.KoA_tag,'string'));

str=get(handles.TimeUnit,'string');

val=get(handles.TimeUnit,'value');

switch str{val}

case 'second'

time=exdata(:,1)/60/60/24;

case 'minute'

time=exdata(:,1)/60/24;

case 'hour'

time=exdata(:,1)/24;

case 'day'

time=exdata(:,1);

end

DO=exdata(:,2);

xo=[Y_in mu_in Ks_in Ko_in];

if get(handles.ABR10,'value')

BR=0.1;

elseif get(handles.ABR20,'value')

BR=0.2;

elseif get(handles.ABR50,'value')

BR=0.5;

elseif get(handles.ABR100,'value')

BR=1;

end

lb=xo-BR*xo;

ub=xo+BR*xo;

[x,resnorm]=lsqcurvefit(@Monod,xo,time,DO,lb,ub,[],XA,Sn,So);

YA=x(1); muA=x(2); KN=x(3); KoA=x(4);

t=linspace(0,time(end),200);

S=Monod(x,t,XA,Sn,So);

function S=Monod(x,time,XA,Sn,So)

Y=x(1);

mu=x(2);

Ks=x(3);

Ko=x(4);

[t,S]=ode45(@respmodel,time,So,[],XA,Sn,mu,Ks,Ko,Y);

function dSdt=respmodel(t,So,XA,Sn,mu,Ks,Ko,Y)

dSdt=-((4.57-Y)/Y)*mu*XA*(Sn/(Ks+Sn))*(So/(Ko+So));


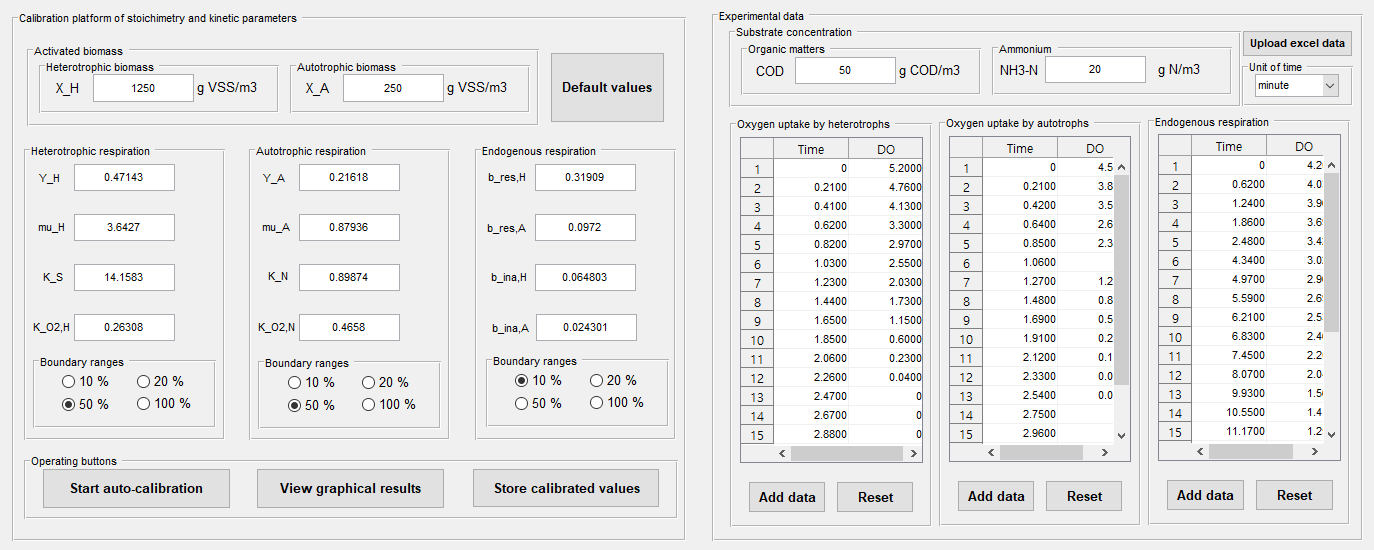


Model calibration platform to estimate parameter values (left frame) with experimental data (right frame).
